# Supplementary material for: Non-Circadian Expression Masking Clock-Driven Weak Transcription Rhythms in U2OS Cells
Source: PubMed Central journal article supplement (PMC4090172; doi:10.1371/journal.pone.0102238), 2014-07-09

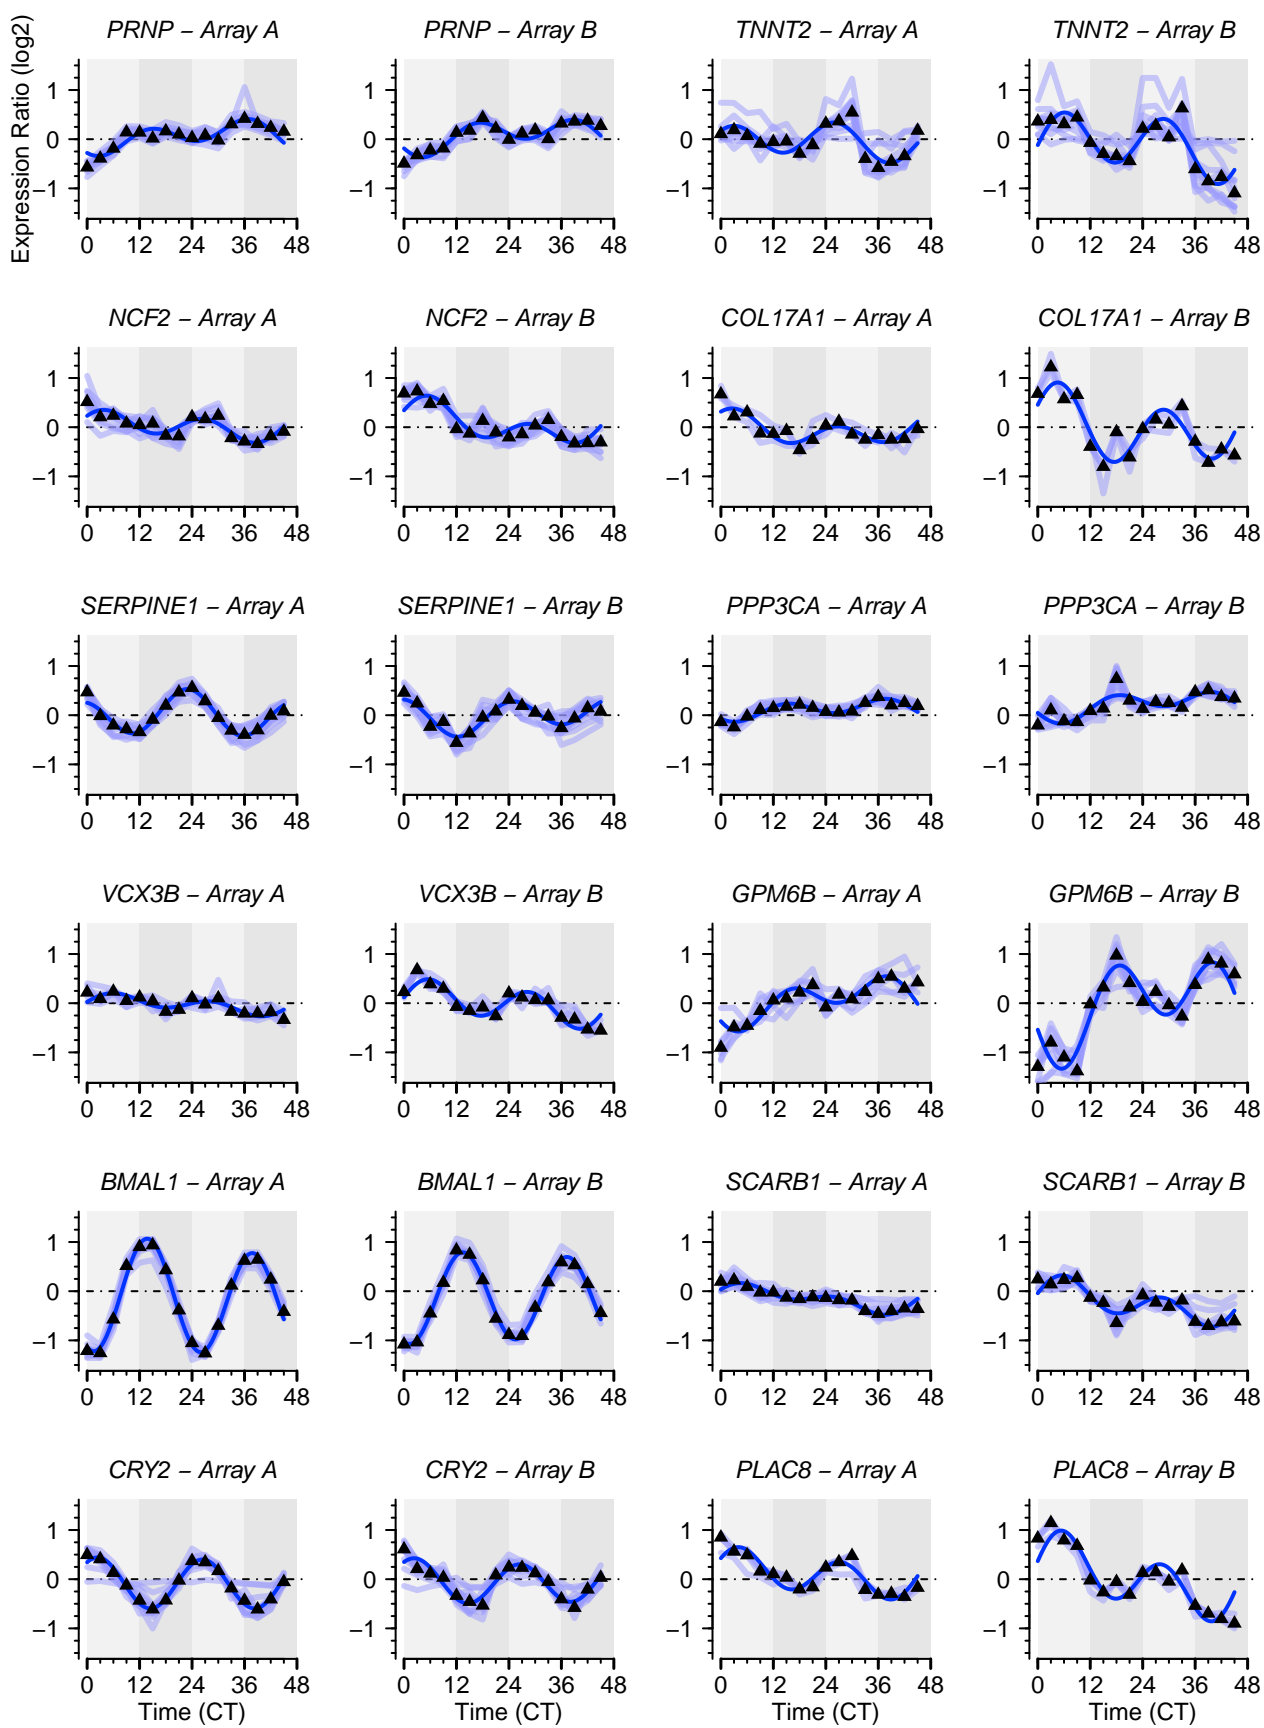

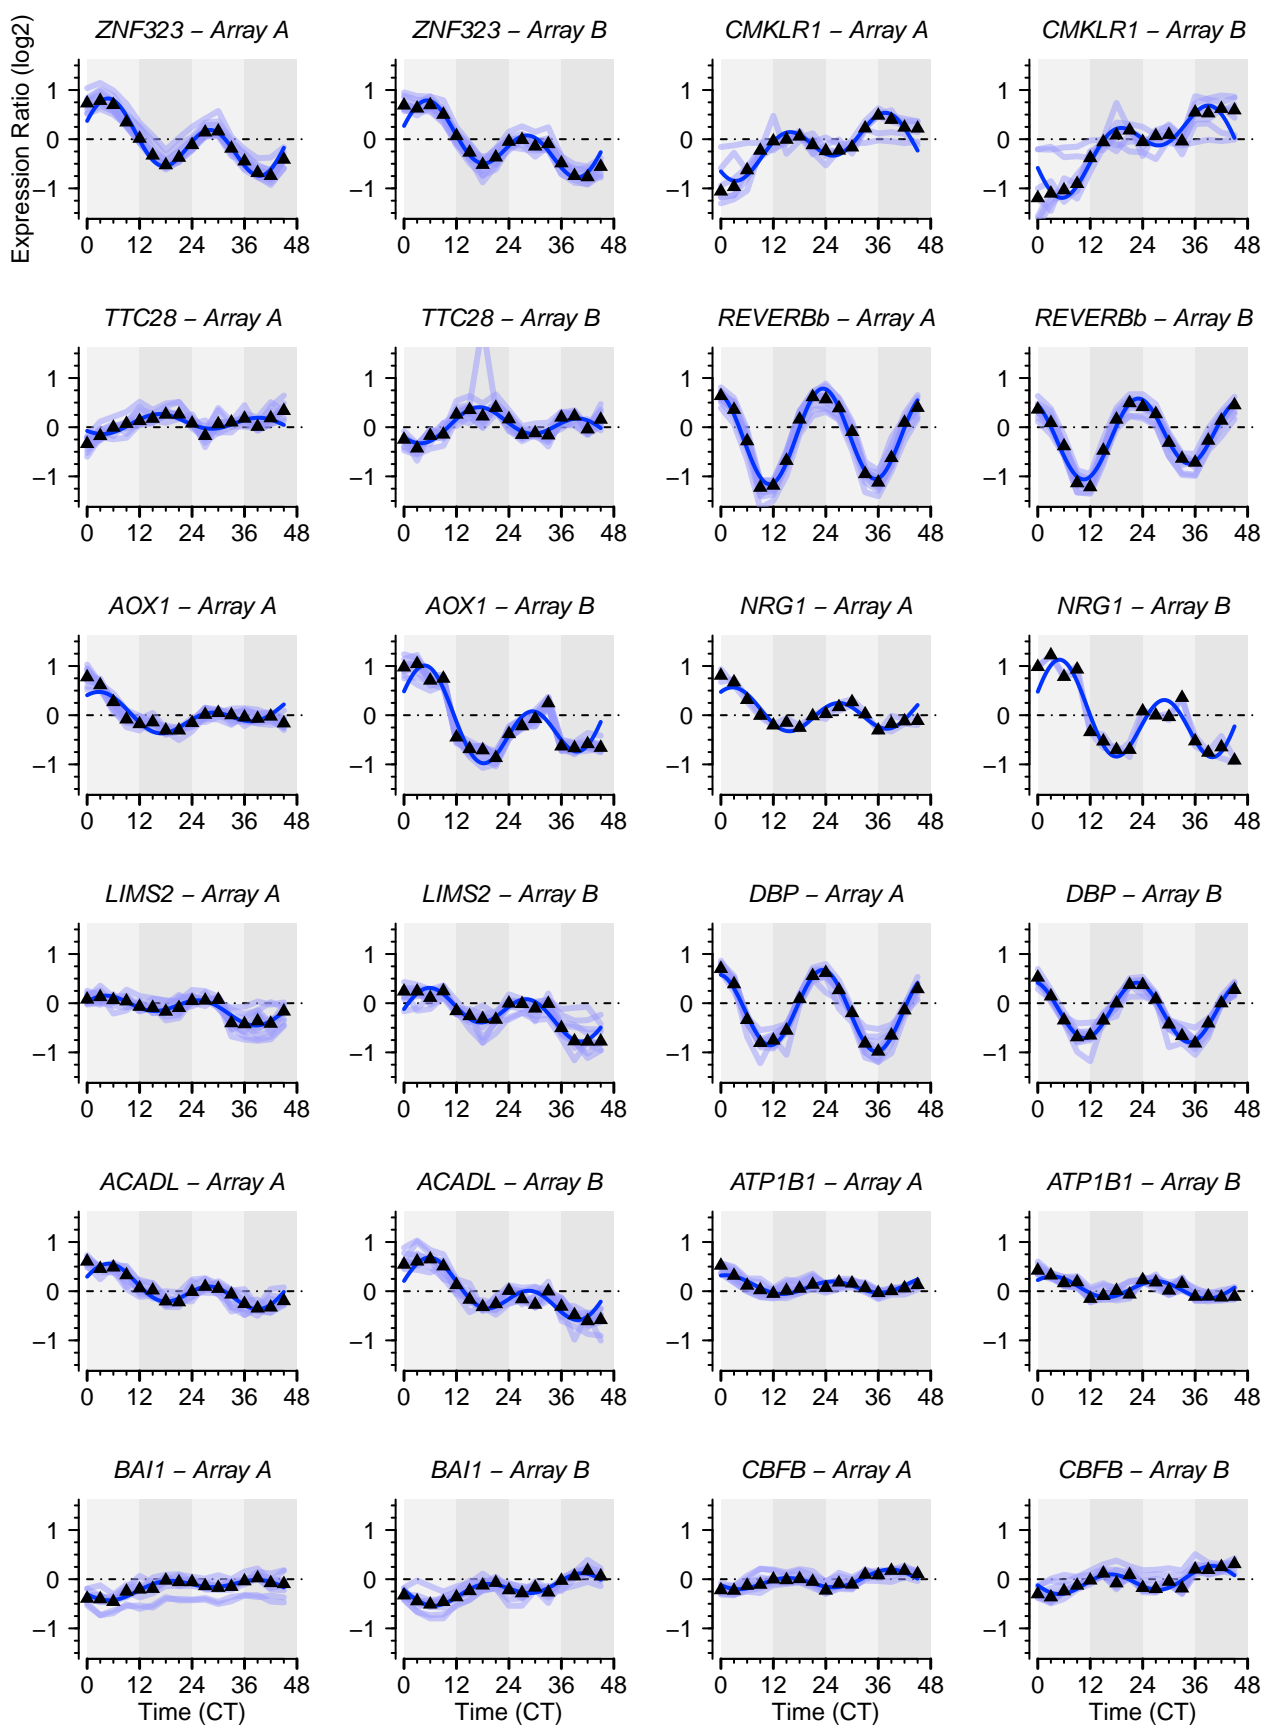

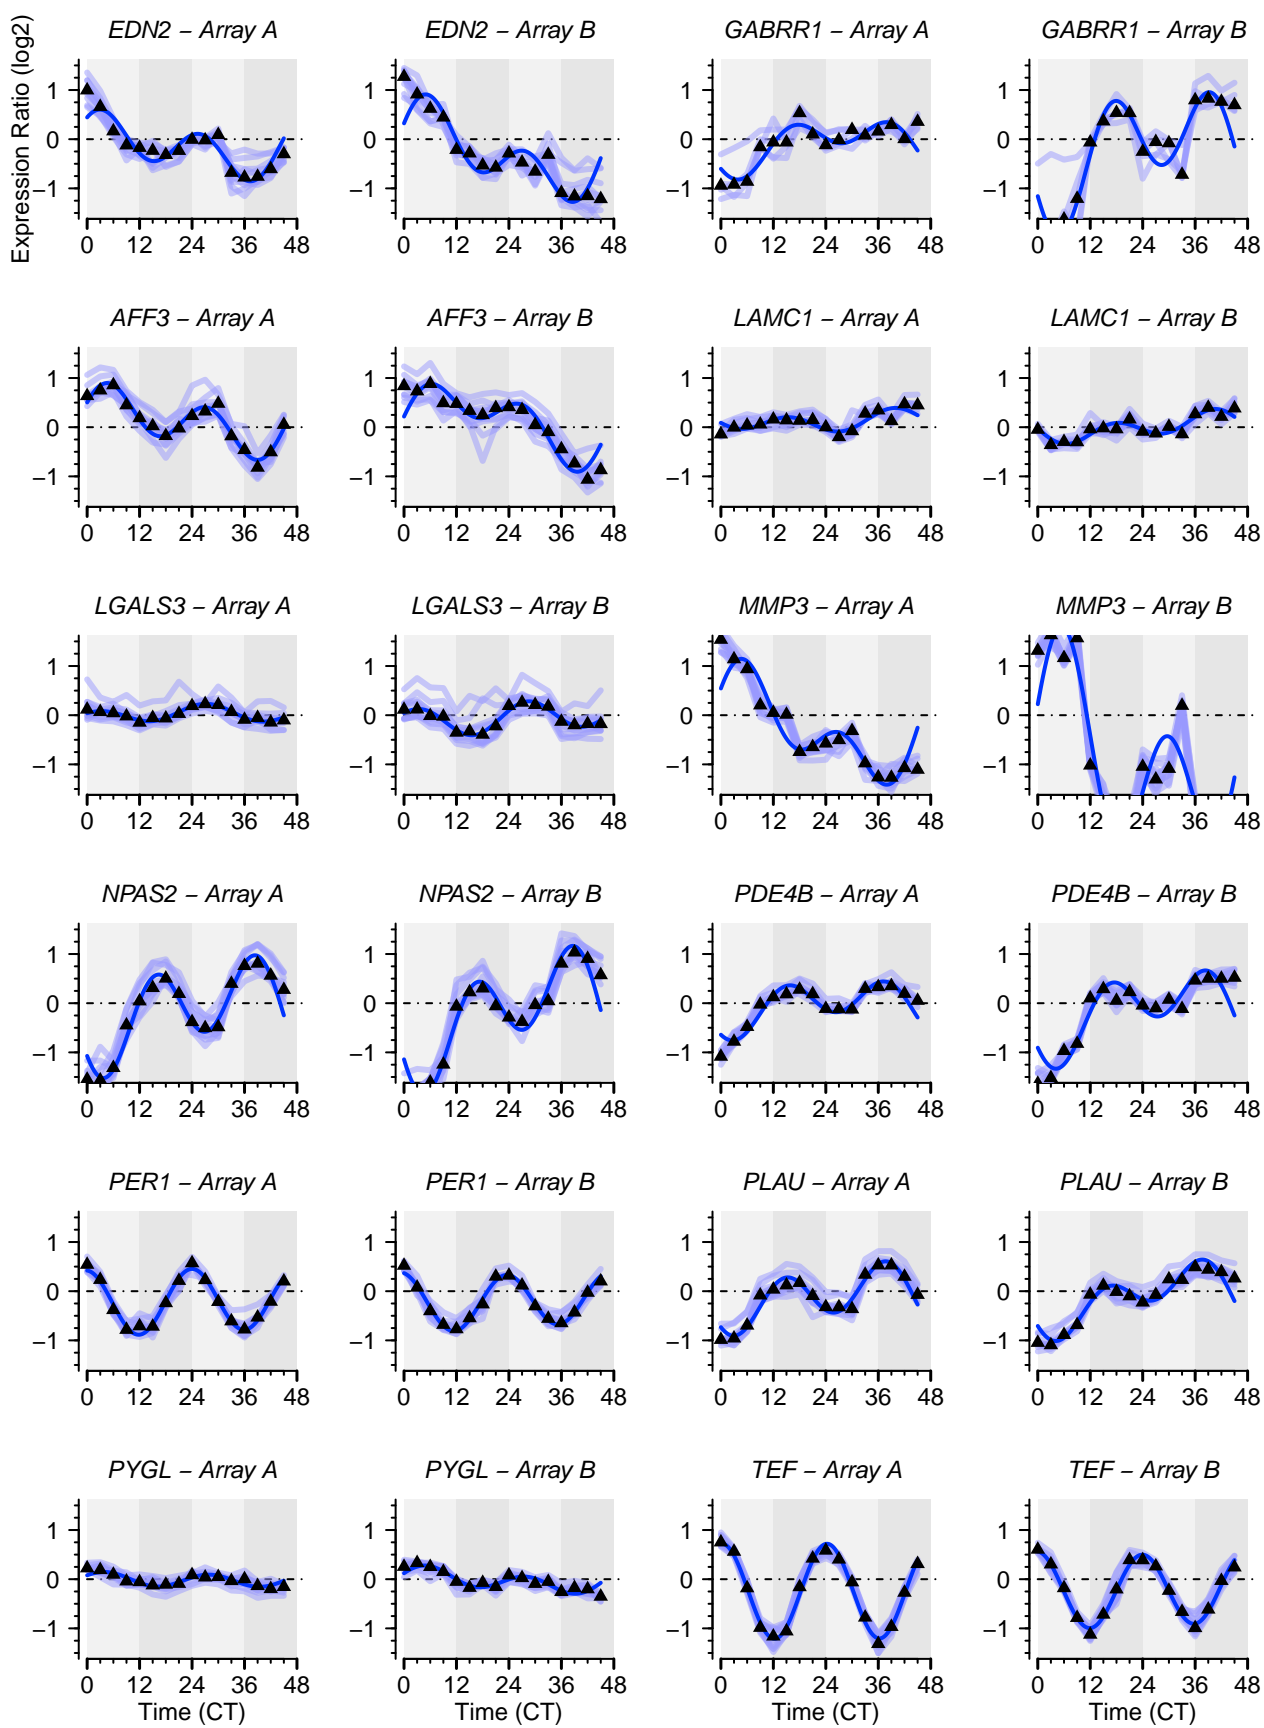

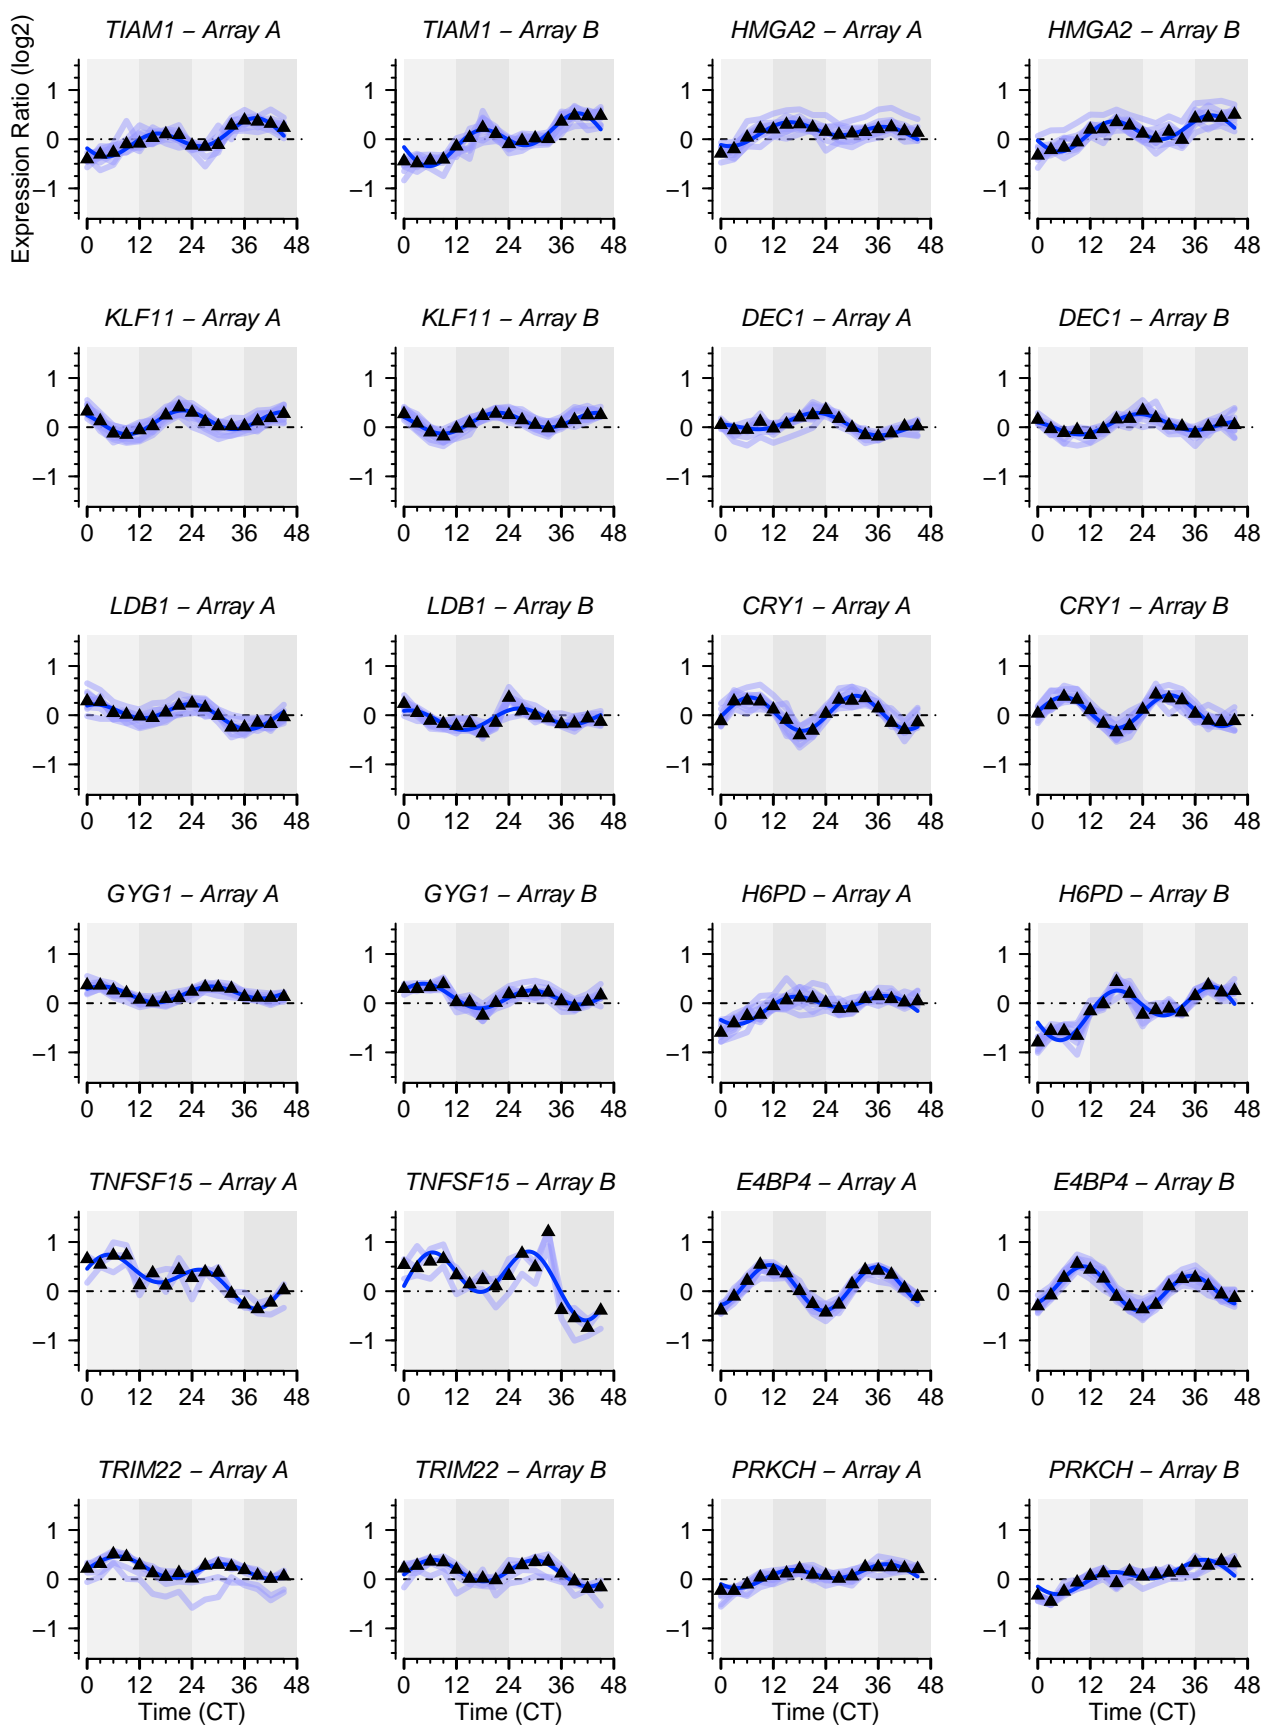



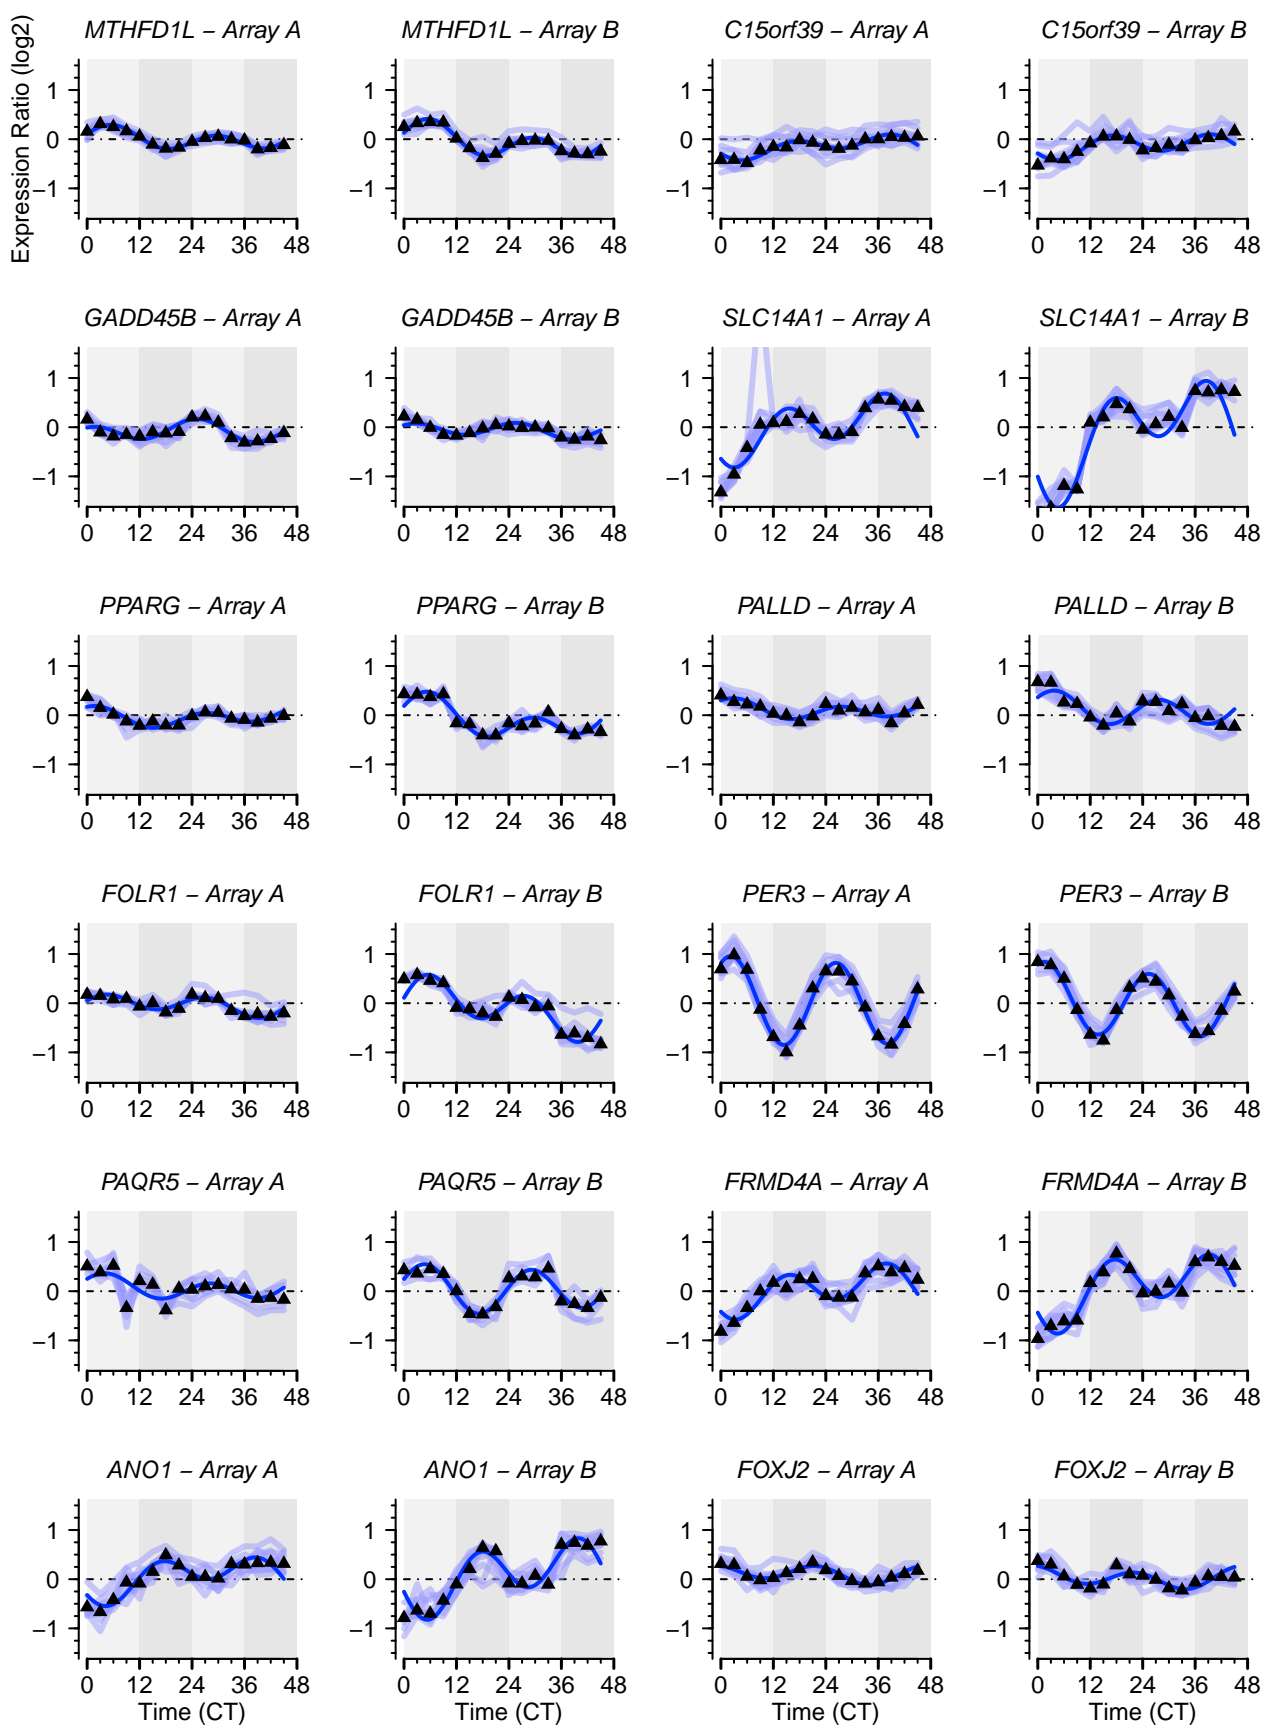

Supplement: pone.0102238.s003.pdf [file pone.0102238.s003.pdf]
